# Supplementary material for: Rhodamine phenol-based fluorescent probe for the visual detection of GB and its simulant DCP
Source: Royal Society of Chemistry journal article supplement (doi:10.1039/d1nj00525a), 2021-01-01
Supplement: d1nj00525a1.pdf [file d1nj00525a1.pdf]

## Electronic Supplementary Information (ESI†)

### **Rhodamine phenol-based fluorescent probe for visual detection of GB and its simulant DCP**

Shouxin Zhang <sup>a</sup>, Chuan Zhou <sup>a</sup>, Bo Yang <sup>a</sup>, Yue Zhao <sup>a</sup>, Lingyun Wang <sup>a</sup>,

Bo Yuan <sup>a, b</sup>, Heguo Li <sup>a, \*</sup>

<sup>a</sup>State Key Laboratory of NBC Protection for Civilian, Beijing 102205, PR China

<sup>b</sup>Beijing Institute of Pharmaceutical Chemistry, Beijing 102205, PR China

#### Contents

|                                                                                      |       |
|--------------------------------------------------------------------------------------|-------|
| 1. NMR and HR-MS spectra of <b>RBNP</b> and <b>RBMP</b>                              | S2-S4 |
| 2. Spectra of of <b>RBMP</b> with DCP                                                | S4-S5 |
| 3. Limit of detection (LOD) for <b>RBNP</b> and <b>RBMP</b> with DCP                 | S6    |
| 4. Kinetics study                                                                    | S7    |
| 5. Interference experiment                                                           | S8    |
| 6. Sensing mechanism                                                                 | S9    |
| 7. Theoretical study                                                                 | S10   |
| 8. Comparison of this work and some representative DCP probes in the past five years | S11-  |
|                                                                                      | S12   |

# 1. NMR and HR-MS spectra of RBNP and RBMP

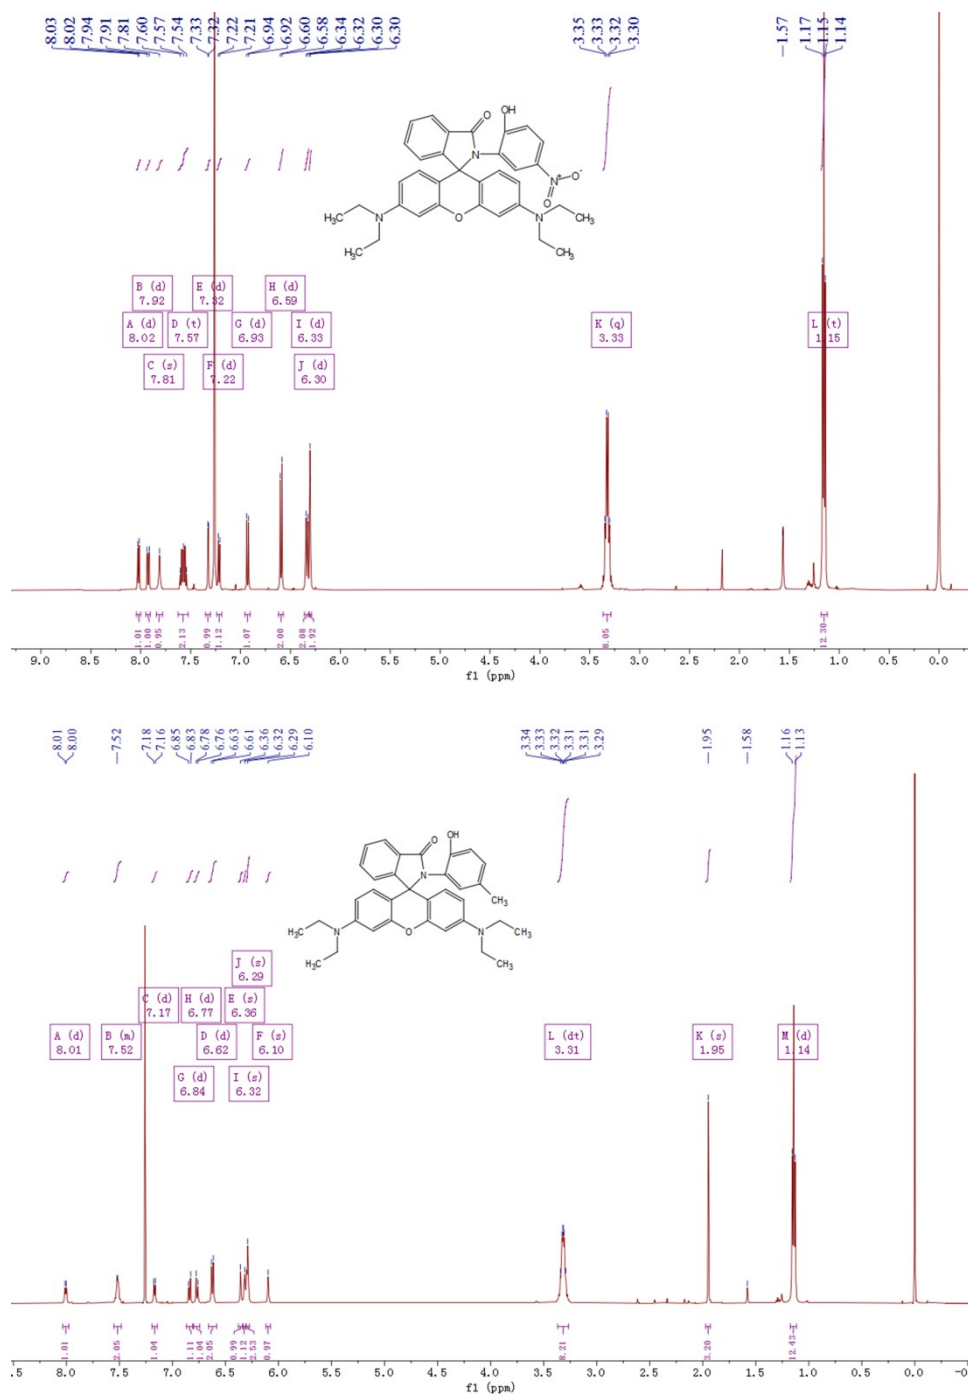

**Fig. S1**  $^1\text{H}$  NMR spectra of **RBNP** (up) and **RBMP** (down) in  $\text{DMSO-}d_6$

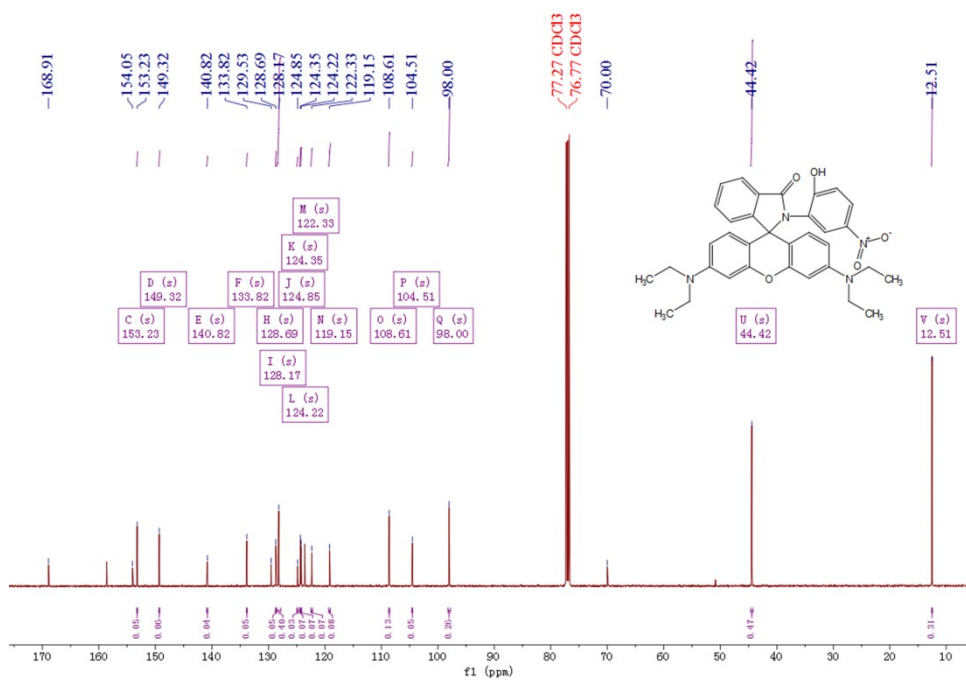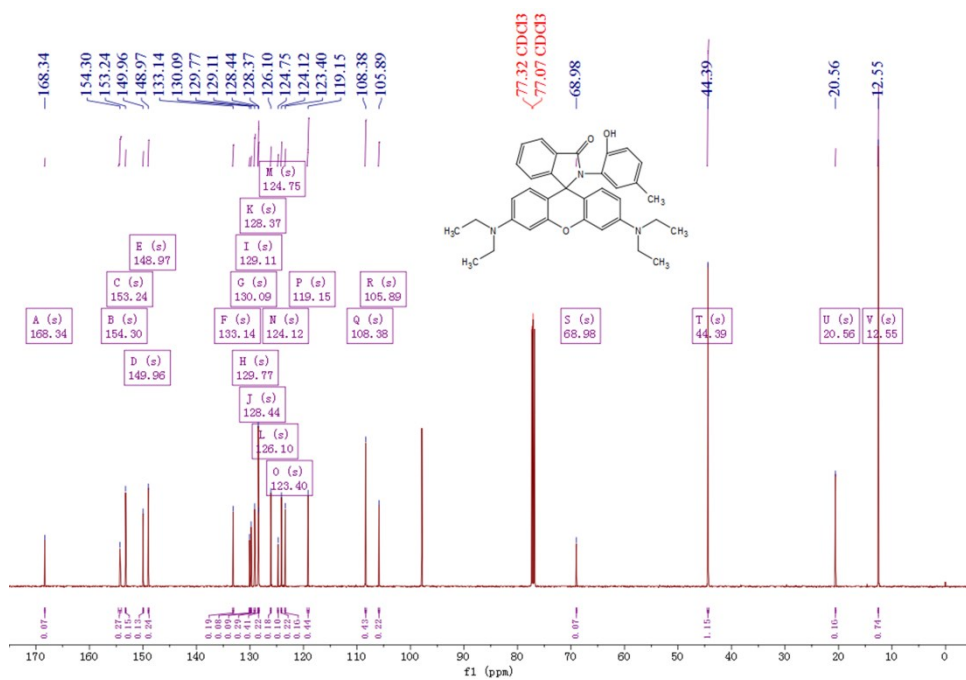

Fig. S2  $^{13}\text{C}$  NMR spectra of **RBNP** (up) and **RBMP** (down) in  $\text{DMSO-}d_6$

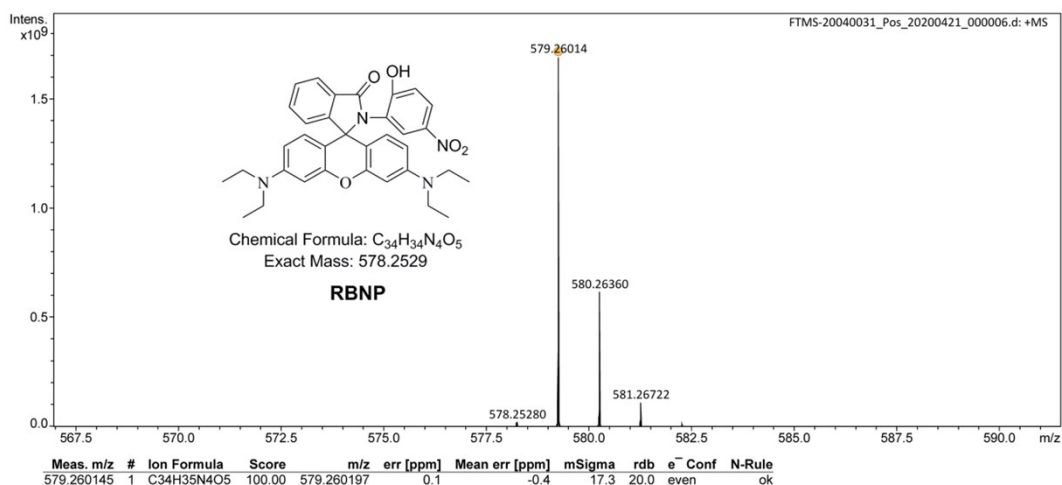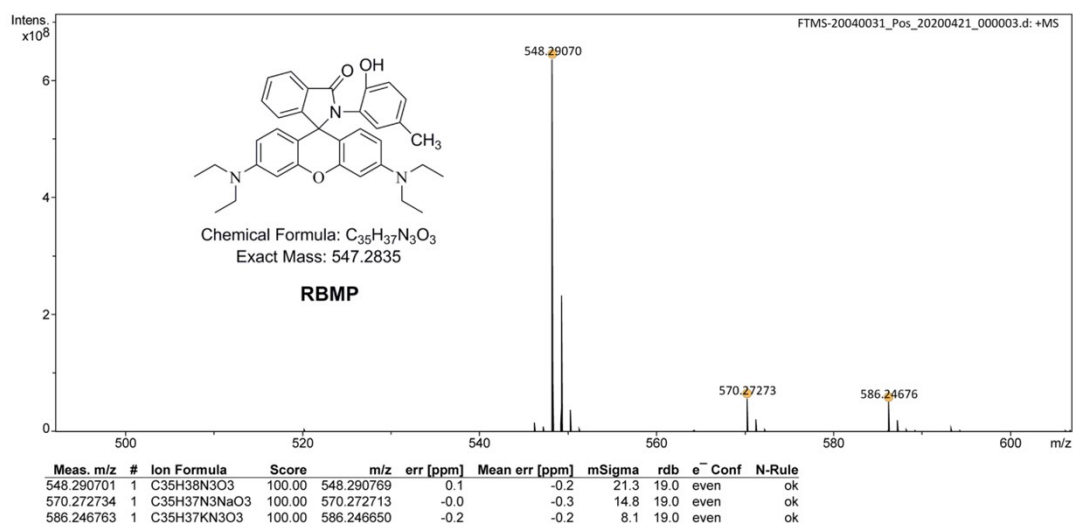

Fig. S3 HR-MS spectra of **RBNP** (up) and **RBMP** (down)

## 2. Spectra for RBMP with DCP

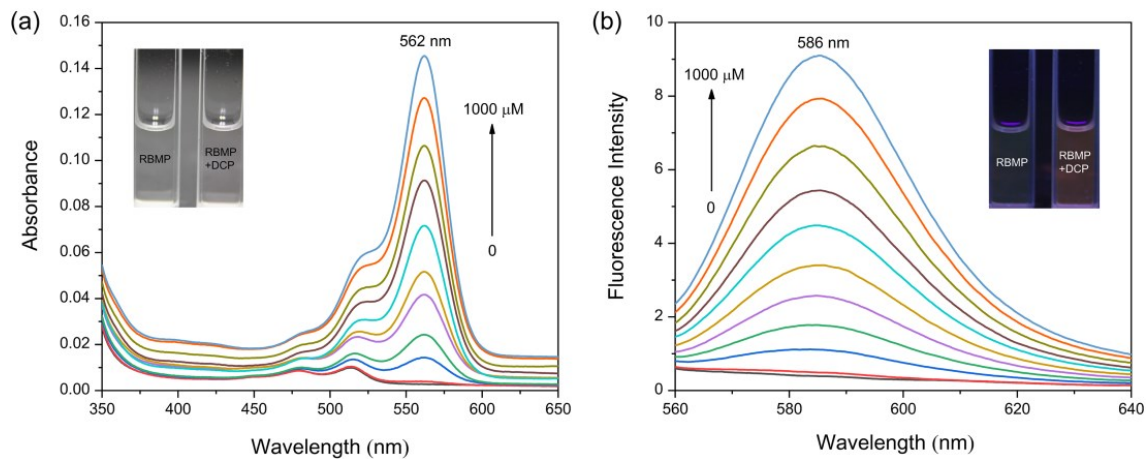

**Fig. S4** (a) UV-Vis spectra of **RBMP** (100  $\mu\text{M}$ ) in DMF upon additions of DCP (1000  $\mu\text{M}$ ). Inset: The color change without and with the addition of DCP. (b) Fluorescence spectra of **RBMP** (50  $\mu\text{M}$ ) in DMF upon additions of DCP (1000  $\mu\text{M}$ ). Inset: The fluorescence change without and with the addition of DCP.

### 3. Limit of detection (LOD) for RBNP and RBMP with DCP

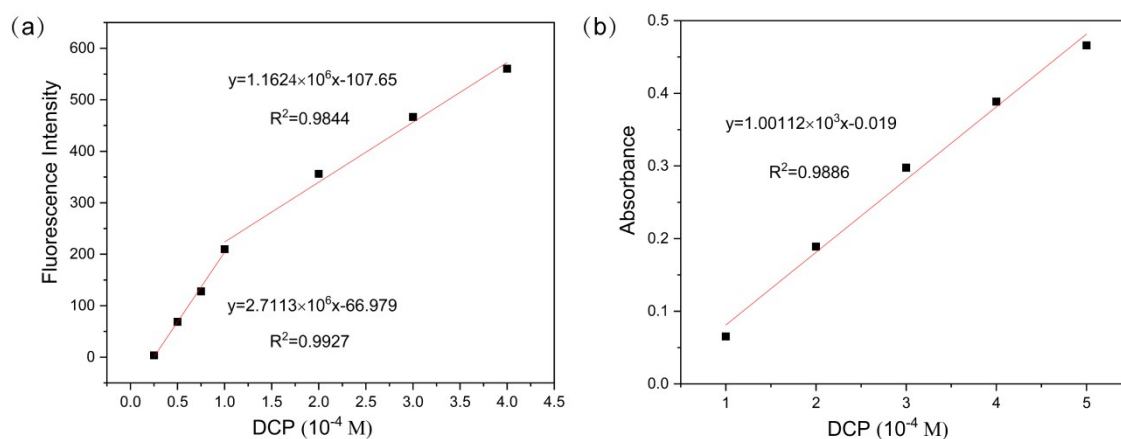

**Fig. S5** (a) The plot of fluorescent intensity at 588 nm of **RBNP** with the concentration of DCP in DMF. (b) The plot of absorbance at 563 nm of **RBNP** with the concentration of DCP in DMF.

From **Fig. S5a**, the slope of the fitting curve  $k_1$  and  $k_2$  is respectively  $2.7113 \times 10^6$  and  $1.1624 \times 10^6$  in the DCP concentration of  $0-1.0 \times 10^{-4}$  M and  $0-4.0 \times 10^{-4}$  M. Then, according to the standard deviation of blank sample  $\delta = 0.0013$  and the formula ( $\text{LOD} = 3\delta/k$ ), the limit of detection (LOD) was calculated as  $1.4 \times 10^{-9}$  M (1.4 nM) and  $3.3 \times 10^{-9}$  M (3.3 nM) in the DCP concentration range of  $0-1.0 \times 10^{-4}$  M and  $0-4.0 \times 10^{-4}$  M.

From **Fig. S5b**, the slope of the fitting curve  $k$  is  $1.001 \times 10^2$  in the DCP concentration from 0 to  $5.0 \times 10^{-4}$  M. Then, according to the standard deviation of blank sample  $\delta = 1.0 \times 10^{-4}$  and the formula ( $\text{LOD} = 3\delta/k$ ), the limit of detection (LOD) was calculated as  $3.1 \times 10^{-7}$  M (0.31  $\mu\text{M}$ ) in the DCP concentration range of  $0-5.0 \times 10^{-4}$  M.

For the probe RBMP, the LOD of FL method was much lower than that of UV-Vis method in the DCP concentration range of  $0-4.0 \times 10^{-4}$  M.

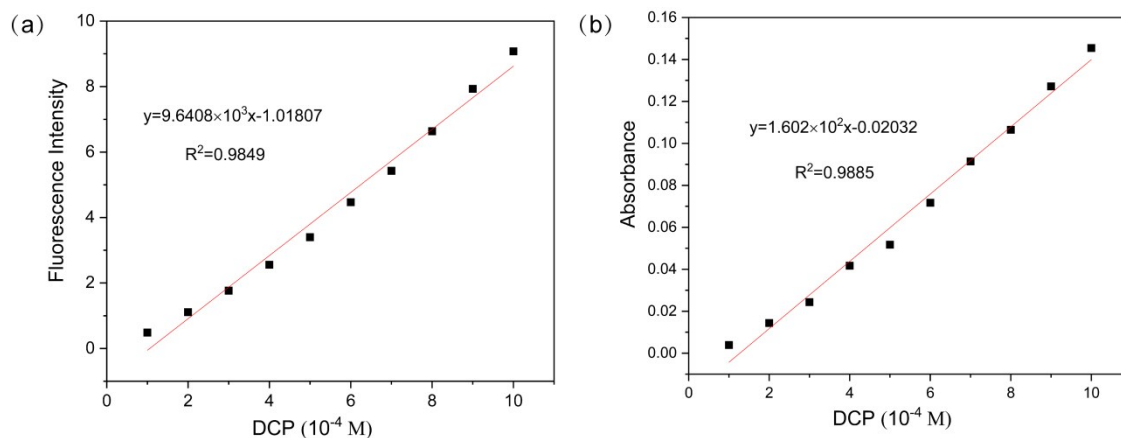

**Fig. S6** (a) The plot of fluorescent intensity at 586 nm of **RBMP** with the concentration of DCP in DMF. (b) The plot of absorbance at 562 nm of **RBMP** with the concentration of DCP in DMF.

From **Fig. S6a**, the slope of the fitting curve  $k$  is  $9.6408 \times 10^3$  in the DCP concentration from 0 to  $10.0 \times 10^{-4}$  M. Then, according to the standard deviation of blank sample  $\delta = 0.0016$  and the formula ( $\text{LOD} = 3\delta/k$ ), the limit of detection (LOD) was calculated as  $5.0 \times 10^{-7}$  M ( $0.5 \mu\text{M}$ ) in the DCP concentration range of  $0-1.0 \times 10^{-4}$  M.

From **Fig. S6b**, the slope of the fitting curve  $k$  is  $1.602 \times 10^2$  in the DCP concentration from 0 to  $10.0 \times 10^{-4}$  M. Then, according to the standard deviation of blank sample  $\delta = 1.3 \times 10^{-4}$  and the formula ( $\text{LOD} = 3\delta/k$ ), the limit of detection (LOD) was calculated as  $2.4 \times 10^{-6}$  M ( $2.4 \mu\text{M}$ ) in the DCP concentration range of  $0-1.0 \times 10^{-4}$  M.

For the probe RBMP, the LOD of FL method was lower than that of UV-Vis method in the DCP concentration range of  $0-1.0 \times 10^{-4}$  M.

#### 4. Kinetics Study

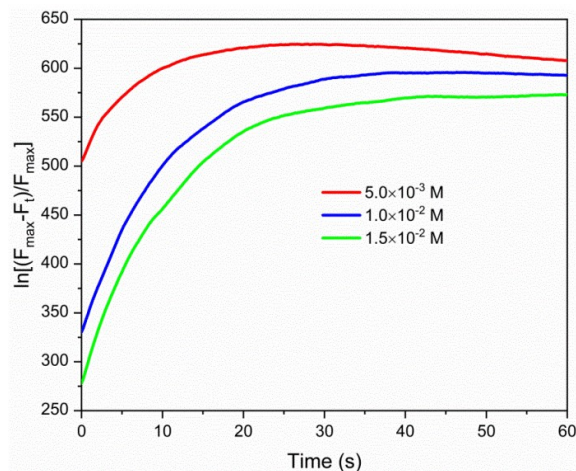

**Fig. S7** Time-dependent fluorescence intensity of **RBNP** (50 μM) at 588 nm with the addition of DCP (5 mM, 10mM, 15mM).

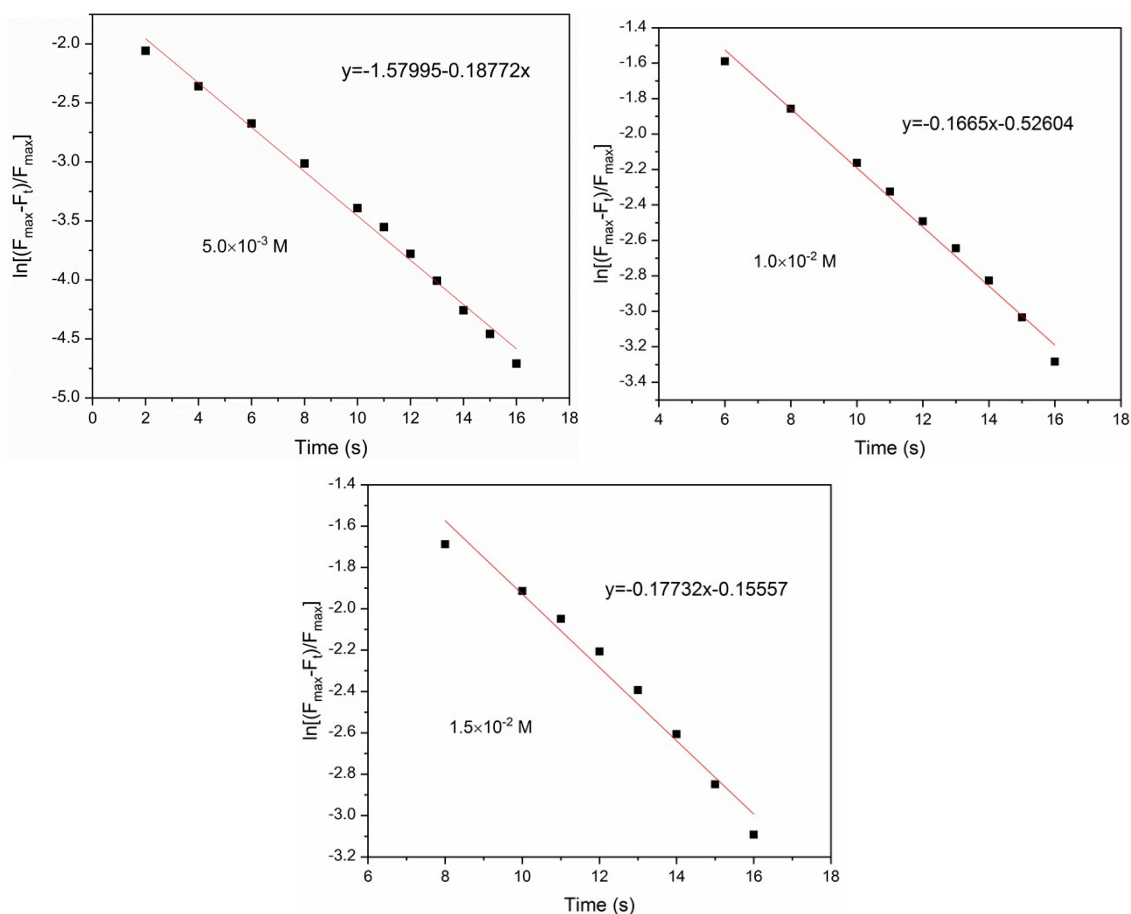

**Fig. S8** Pseudo-first-order kinetic plots of reaction between **RBNP** (50 μM) and different concentrations of DCP (5 mM, 10mM, 15mM) in DMF.

## 5. Interference experiment

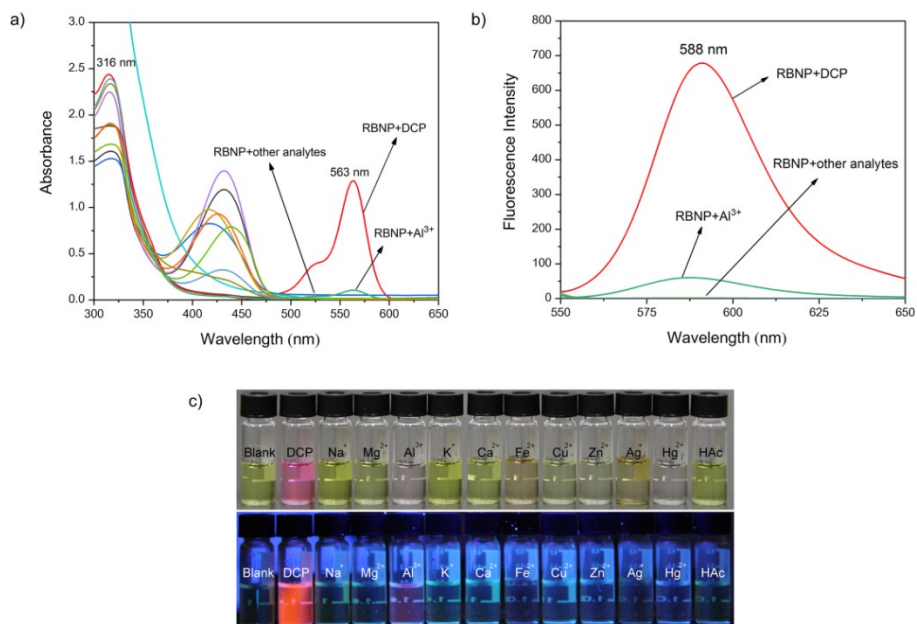

**Fig. S9** UV-Vis absorption (a), fluorescent intensity (b) of **RBNP** with DCP, metal ion and HAc (10 equiv.). (c) The color changes of **RBNP** with DCP metal ion and HAc (10 equiv.) under sunlight (up) and 365nm UV light (down).

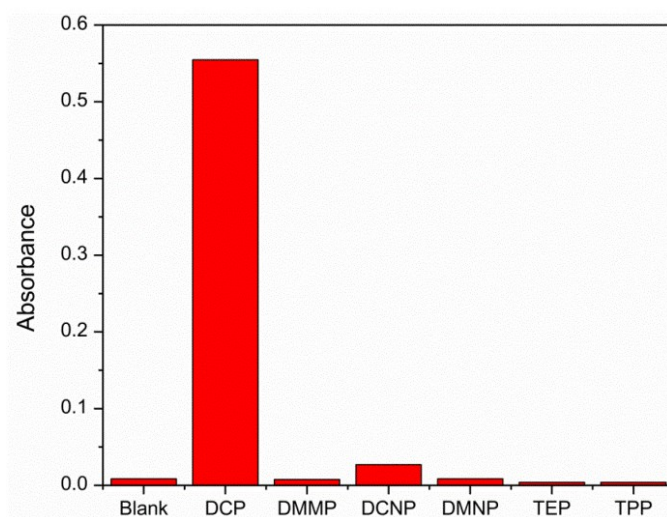

**Fig. S10** UV-Vis absorption of **RBNP** (100 μM) to DCP (1000 μM) and other interferents (1000 μM).



## 6. Sensing mechnism

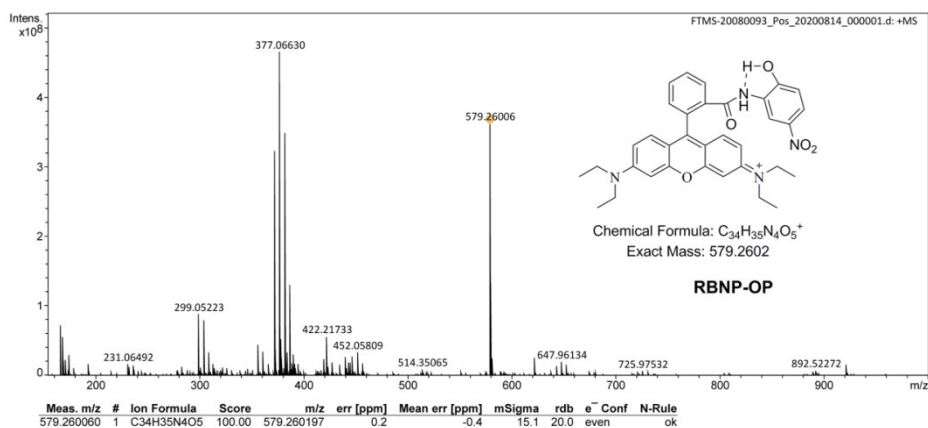

**Fig. S11** HR-MS of RBNP-OP

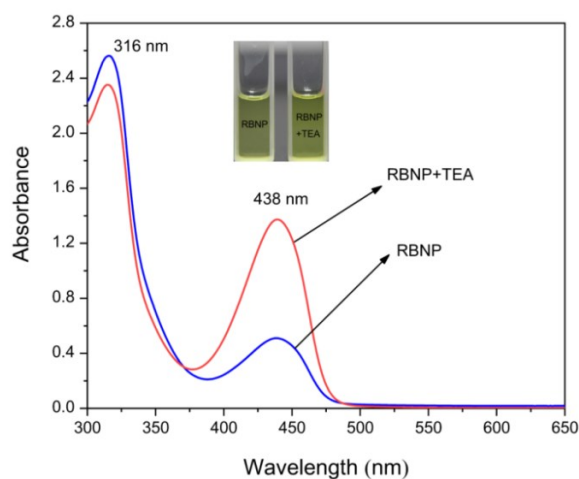

**Fig. S12** UV-Vis spectra of RBNP (50  $\mu$ M) in DMF without and with TEA (1000  $\mu$ M).

Inset: The color change without and with the addition of TEA.

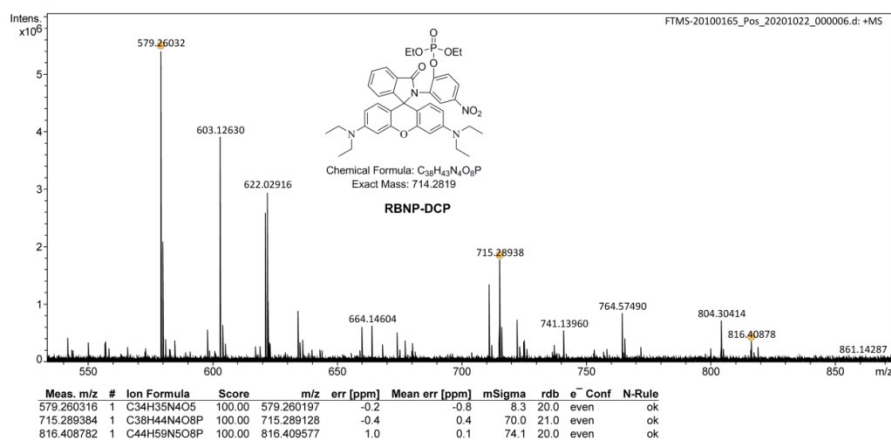

**Fig. S13** HR-MS of RBNP-DCP

## 7. Theoretical Study

**Table S1:** Selected electronic transition energies (eV), oscillator strengths (f) and main orbital configurations of **RBNP** and **RBNP-OP**. [a] Only selected transition states were considered. The numbers in parentheses are the transition energy in wavelength. [b] Oscillator strength. [c] H stands for HOMO and L stands for LUMO.

| Molecules      | Electronic transition          | Transition Energy <sup>a</sup> | f <sup>b</sup> | Composition <sup>c</sup> | (Composition) % |
|----------------|--------------------------------|--------------------------------|----------------|--------------------------|-----------------|
| <b>RBNP</b>    | S <sub>0</sub> →S <sub>7</sub> | 3.8656eV 320.74nm              | 0.0191         | H→L+2                    | 97.2            |
|                | S <sub>0</sub> →S <sub>8</sub> | 3.9619eV 312.94nm              | 0.1400         | H-3→L, H-4→L             | 62.9, 23.6      |
| <b>RBNP-OP</b> | S <sub>0</sub> →S <sub>1</sub> | 2.5559eV 485.09nm              | 0.9583         | H→L                      | 98.4            |
|                | S <sub>1</sub> →S <sub>0</sub> | 2.2906eV 541.27nm              | 1.1174         | H→L                      | 99.6            |

**Table S2:** Energies of the highest occupied molecular orbital (HOMO) and lowest unoccupied molecular orbital (LUMO) of **RBNP** and **RBNP-OP**.

| Species        | E <sub>HOMO</sub> (a.u) | E <sub>LUMO</sub> (a.u) | ΔE(a.u)  | ΔE(eV)   | ΔE(kJ/mol) |
|----------------|-------------------------|-------------------------|----------|----------|------------|
| <b>RBNP</b>    | -0.193131               | -0.090331               | 0.102800 | 2.797327 | 269.901049 |
| <b>RBNP-OP</b> | -0.210793               | -0.108325               | 0.102468 | 2.788288 | 269.029001 |

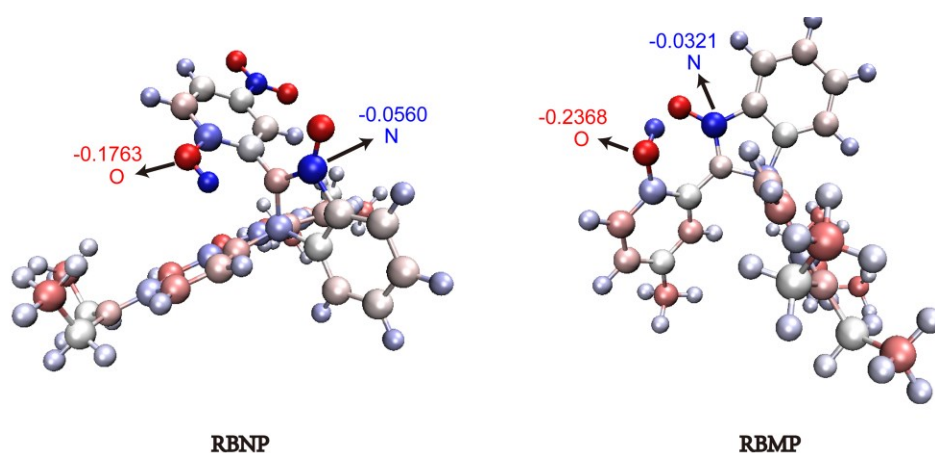

**Fig. S14** Partial atomic charges of **RBNP** and **RBMP**

## 8. Comparison of this work and some reported DCP probes in the past five years.

| Chemical structure                                                                  | LOD for solution | Vapor detection |               | Visual detection for naked eye | Reference                                          |
|-------------------------------------------------------------------------------------|------------------|-----------------|---------------|--------------------------------|----------------------------------------------------|
|                                                                                     |                  | Concentration   | Response time |                                |                                                    |
| 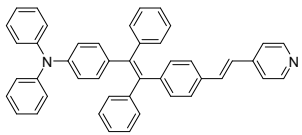   | -                | 0.377 ppm       | 30 s          | -                              | J. Mater. Chem. C<br>4 (2016) 10105-10110          |
|    | 0.71 µg/L        | 132 ppm         | 3 s           | -                              | Anal. Chem.<br>88 (2016) 9259-9263                 |
|    | 14.2 µM          | -               | -             | colorless to pink              | Sensors and Actuators B<br>235 (2016) 447-456      |
|   | 1.6 µM           | -               | -             | Orange to cyan (UV-light)      | New J. Chem.<br>41 (2017) 6661-6666                |
|  | 21 nM            | 130 ppm         | 5 min         | white to yellow                | J. Mater. Chem. C<br>5 (2017) 7337-7343            |
|  | 0.1 µM           | 50 ppm          | 1 min         | colorless to light yellow      | Analyst<br>143 (2018) 4171-4179                    |
|  | -                | 130 ppm         | 100 s         | light yellow to yellow         | ACS Sensors<br>3 (2018) 1445-1450                  |
|  | 0.065 µM         | -               | -             | green to light gold            | Journal of Hazardous Materials<br>342 (2018) 10-19 |
|  | 1.87 ppb         | 50 µM           | 3 s           | -                              | Sensors and Actuators B<br>255 (2018) 176-182      |
|  | 5.6 nM           | -               | 30 s          | colorless to deep pink         | Scientific Reports<br>8 (2018) 3402                |

|                                                                                     |                     |                           |              |                          |                                                                                     |
|-------------------------------------------------------------------------------------|---------------------|---------------------------|--------------|--------------------------|-------------------------------------------------------------------------------------|
| 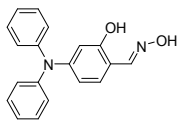   | 0.14 $\mu\text{M}$  | 10 $\mu\text{M}$          | 30 s         | colorless to yellow      | Dyes and Pigments<br>170 (2019) 107585                                              |
|    | 9.66 nM             | -                         | -            | colorless to pink        | Dyes and Pigments<br>171 (2019) 107712                                              |
|    | 93.8 nM             | 6 ppm                     | 60 s         | colorless to light brown | New J. Chem.<br>43 (2019) 8627-8633                                                 |
|    | 2 $\mu\text{M}$     | DCP 20ppm<br>GD 40 ppm    | 10min        | colorless to pink        | Molecules<br>24 (2019) 827                                                          |
|    | 0.16 $\mu\text{M}$  | 130 ppm                   | 20 s (fiber) | -                        | Sensors & Actuators B<br>318 (2020) 127937                                          |
|   | 0.186 $\mu\text{M}$ | 100 ppm                   | 2 min        | -                        | Sensors & Actuators B<br>319 (2020) 128282                                          |
|  | 15.8 nM             | 100 ppm                   | 60 s         | -                        | Journal of<br>Photochemistry &<br>Photobiology A:<br>Chemistry<br>388 (2020) 112188 |
|  | 1.4 nM              | DCP 130 ppm<br>GB 100 ppm | 30 s         | light yellow to pink     | <b>This work</b>                                                                    |
